# Supplementary material for: Investigating the effect of stearoyl-coenzyme desaturase 1 inhibition on inflammatory and anti-inflammatory patterns in luminal A breast cancer patients peripheral blood mononuclear cells
Source: Research Square preprint supplement (doi:10.21203/rs.3.rs-6911415/v1), 2025-07-28
Supplement: Supplementary file 1 [file 2a3b638461b52c4516132432.docx]

**Supplementary data:**

| **Table 1.** The sequence of primers used in qPCR. | | | |
| --- | --- | --- | --- |
| **Gene name** | **Forward primer (5’→3’)** | **Reverse primer (5’→3’)** | **Tm** |
| β-Actin | TCCCTGGAGAAGAGCTACG | GTAGTTTCGTGGATGCCACA | 59.2 |
| FoxP3 | GCCTCCCACCTGGGATCAAC | AGACCTTCTCACATCCGGGC | 62.1 |
| IL10 | ACATCAAGGCGCATGTGAAC | AGATGCCTTTCTCTTGGAGCTTA | 59.2 |
| IL17 | ACCTTGGAATCTCCACCGC | GGATCTCTTGCTGGATGGGG | 62.1 |
| TNF-α | GCCCATGTTGTAGCAAACCC | TGAGGTACAGGCCCTCTGAT | 59.2 |
| TGF-β | TTGATGTCACCGGAGTTGTG | CCGGTAGTGAACCCGTTG | 63.0 |
| RoRc | CATGTCCCGAGATGCTGTCA | GGTTCCTGTTGCTGCTGTTG | 57.8 |

| **Table 2.** Measured parameters in study groups. Data are presented as mean±standard division. P<0.05 was considered as statistically significant. Non-similar letters represent for significant statistical difference. | | | | | | |
| --- | --- | --- | --- | --- | --- | --- |
| **mRNA level** | **parameters** | **Control-DMSO** | **Control-SCDi** | **BC-DMSO** | **BC-SCDi** | **p** |
| Anti-inflammatory cytokines | IL-10 | 1.0±0a | 0.56±0.11a | 22.91±4.12a | 120.96±21.78b | 0.0011 |
| TGF-β | 1.0±0a | 0.01±0.01a | 0.81±0.8a | 12.06±4.41b | 0.004 |
| inflammatory cytokines | IL-17 | 1.0±0a | 1.72±0.89a | 61.5±3.1b | 21.5±2.3c | <0.0001 |
| TNF-α | 1.0±0a | 0.59±0.41a | 12.66±2.33b | 0.59±0.36a | 0.001 |
| Anti-inflammatory differentiative marker | FoxP3 | 1.0±0a | 0.12±0.07a | 3.5±1.73a | 87.16±9.62b | 0.0001 |
| Inflammatory differentiative marker | RORc | 1.0±0a | 0.15±0.05b | 0.0001±0.00008c | 0.001±0.0005c | <0.0001 |
| **Protein level** | **parameters** | **Control-DMSO** | **Control-SCDi** | **BC-DMSO** | **BC-SCDi** | **p** |
| Anti-inflammatory cytokines | IL-10 | 7.33±1.52a | 8.66±3.51a | 11.0±2.64a | 422.66±31.64b | <0.0001 |
| TGF-β | 11.33±2.08a | 9.0±2.64a | 15.0±2.64a | 151.66±6.02b | <0.0001 |
| inflammatory cytokines | IL-17 | 15.0±2.64a | 17.66±3.05a | 343.66±10.96b | 216.33±7.37c | <0.0001 |
| TNF-α | 27.33±2.51a | 18.66±6.42a | 311.0±16.09b | 25.0±2.64a | <0.0001 |
| Anti-inflammatory differentiative marker | FoxP3 | 3.33±0.57a | 4.0±2.08a | 4.6±2.08a | 35.0±4.0b | <0.0001 |
| Inflammatory differentiative marker | RORc | 48.66±8.96a | 10.33±3.21b | 2.66±0.57b | 2.33±1.52b | <0.0001 |

Data are presented as mean±standard division. P<0.05 was considered as statistically significant. Non-similar letters represent for significant statistical difference.
